# Supplementary material for: New Delhi Metallo-Beta-Lactamase Facilitates the Emergence of Cefiderocol Resistance in Enterobacter cloacae
Source: PubMed Central journal article supplement (PMC8846454; doi:10.1128/aac.02011-21), 2022-02-15
Supplement: aac.02011-21-s0001.pdf [file aac.02011-21-s0001.pdf]

## Supplementary Appendix

### New Delhi metallo-beta-lactamase facilitates the emergence of cefiderocol resistance in *Enterobacter cloacae*.

#### Content

|                                                                                                                                                                                 |   |
|---------------------------------------------------------------------------------------------------------------------------------------------------------------------------------|---|
| Supplementary Figure S1. Growth curve of <i>Enterobacter cloacae</i> with <i>cirA</i> mutations compared to the wild type. ....                                                 | 2 |
| Supplementary Figure S2. Comparison of gene protein sequence to identify functional mutations associated with cefiderocol resistance in <i>Enterobacter cloacae</i> . ....      | 3 |
| Supplementary Figure S3. Sequencing coverage and expression of <i>bla<sub>NDM</sub></i> in cefiderocol-susceptible and cefiderocol-resistant <i>Enterobacter cloacae</i> . .... | 4 |
| Supplementary Table S1. Molecular characteristics of study isolates .....                                                                                                       | 5 |
| Supplementary Table S2. Sequencing statistics .....                                                                                                                             | 6 |
| References.....                                                                                                                                                                 | 7 |

**Supplementary Figure S1. Growth curve of *Enterobacter cloacae* with *cirA* mutations compared to the wild type.** There were no significant changes to the growth characteristics of *E. cloacae* isolates with mutated *cirA* gene compared to the initial wild type over 15 hours with measurements every 5 minutes. Data presented are measurements every 60 minutes as biological triplicates. a Growth curve for isolate *etcl\_1* in tryptic soy broth (TSB), left panel and in iron-depleted cation-adjusted Mueller-Hinton broth (ID-CAMHB), right panel. b Growth curve for isolate KE5351 in TSB (left panel) and ID-CAMHB (right panel).

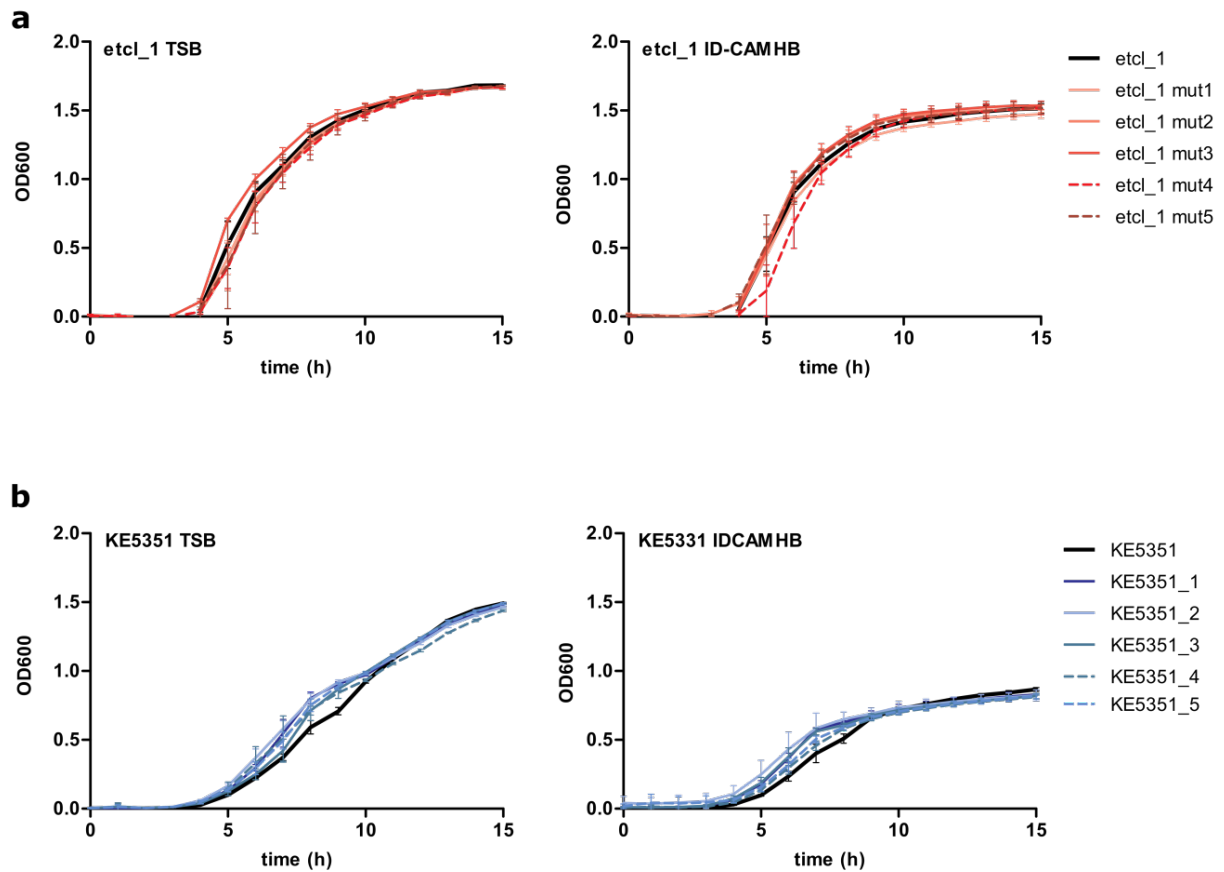

**Supplementary Figure S2. Comparison of gene protein sequence to identify functional mutations associated with cefiderocol resistance in *Enterobacter cloacae*.**

Gene-by-gene comparison (heatmap) at the protein level indicated that on the *cirA* gene and the IS5 family transposon IS903 were mutated in both in vitro generated cefiderocol-resistant mutants of *etcl\_1* (left panel) and KE5351 (right panel). Grey squares indicate non identical protein compared to the original strain; black squares indicate identical protein sequence to the wild type. The phylogenetic tree is based on the whole core genome curated for recombination event using Gubbins (4579638 nucleotides, 4815 genes for *etcl\_1* and 4554210 nucleotides, 4795 genes for KE5351).

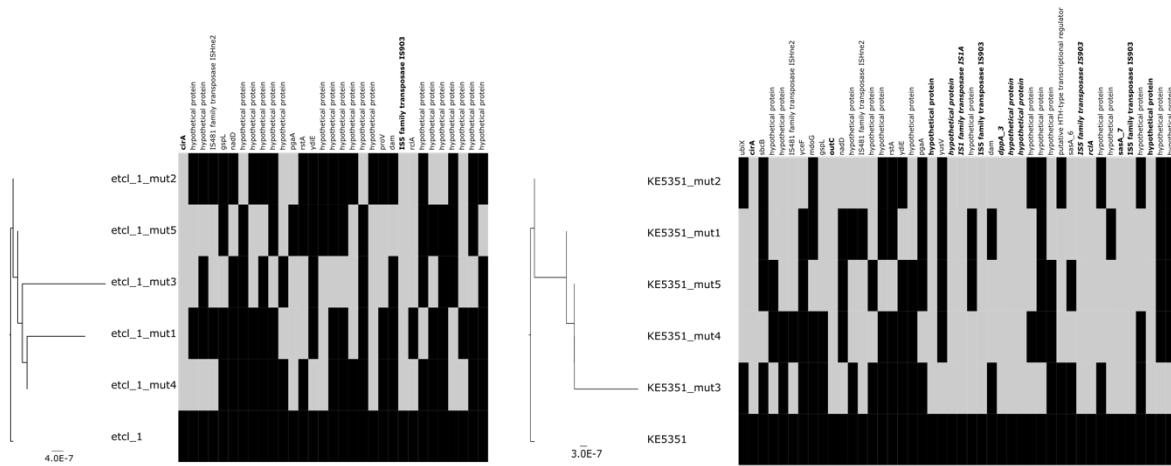

**Supplementary Figure S3. Sequencing coverage and expression of *bla*<sub>NDM</sub> in cefiderocol-susceptible and cefiderocol-resistant *Enterobacter cloacae*.**

(A) sequencing coverage of *bla*<sub>NDM-5</sub> (left panel) and *bla*<sub>OXA-48</sub> (right panel) relative to *gyrB* as a proxy for gene copy numbers. (B) mRNA expression of *bla*<sub>NDM</sub> relative to 16s *rRNA*, determined as biological and technical duplicates. There were no association between *bla*<sub>NDM</sub> expression or relative sequencing coverage and the phenotypic cefiderocol resistance, indicating that the cefiderocol resistance is not mediated by *bla*<sub>NDM</sub> overexpression.

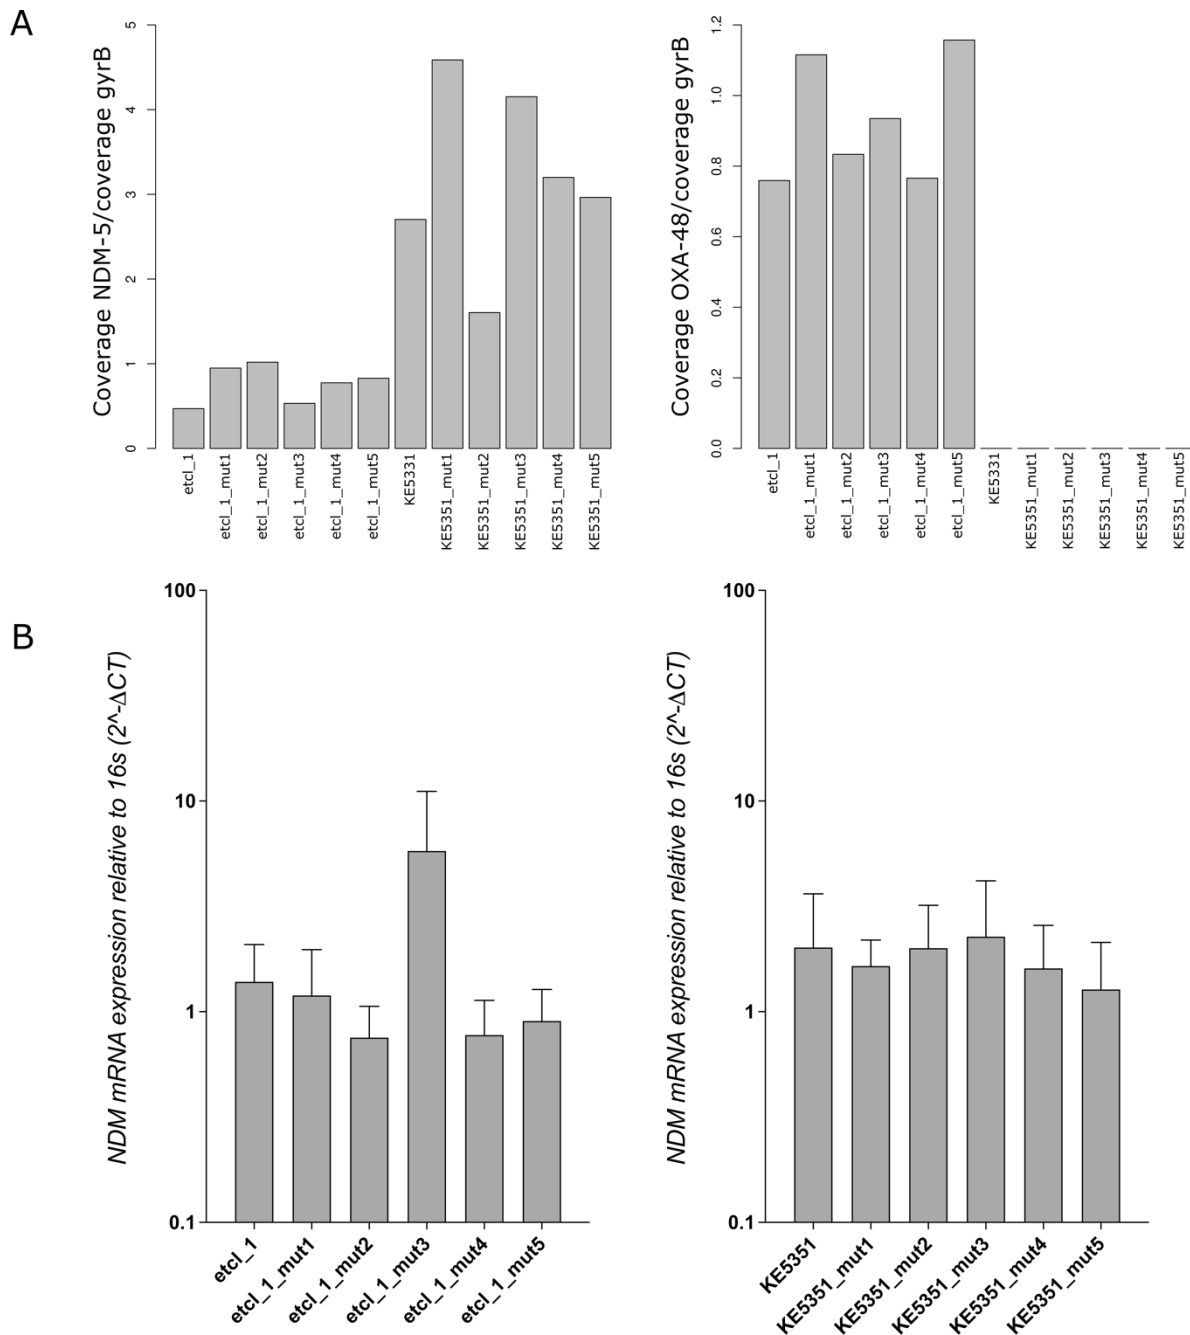

**Supplementary Table S1. Molecular characteristics of study isolates**

| ID       | Species                             | beta-lactamase   | MLST | origin           | study                            |
|----------|-------------------------------------|------------------|------|------------------|----------------------------------|
| DSM30054 | <i>Enterobacter cloacae complex</i> | none             | ST1  | type strain      | n/a                              |
| KE9800   | <i>Enterobacter cloacae complex</i> | OXA-48           | ST96 | clinical isolate | this study                       |
| KE5351   | <i>Enterobacter cloacae complex</i> | NDM-5            | ST96 | clinical isolate | this study                       |
| KE9132   | <i>Enterobacter cloacae complex</i> | KPC-2            | ST96 | clinical isolate | this study                       |
| etcl_1   | <i>Enterobacter cloacae complex</i> | NDM-5 and OXA-48 | ST96 | clinical isolate | Klein <i>et al.</i> <sup>1</sup> |

**Supplementary Table S2. Sequencing statistics**

| Sample ID   | Species                             | MLST | Assembly<br>SPAdes<br>Version | Bioproject<br>Number (NCBI) | Accession-Nr. | coverage | No. of<br>contigs | Largest<br>contig | Total length | GC (%) | N50    | N75    | L50 | L75 |
|-------------|-------------------------------------|------|-------------------------------|-----------------------------|---------------|----------|-------------------|-------------------|--------------|--------|--------|--------|-----|-----|
| etcl_1      | <i>Enterobacter cloacae</i> complex | 96   | 3.13.0                        | PRJNA705064                 | SAMN19988671  | 34       | 56                | 943666            | 5144974      | 55.38  | 269554 | 131255 | 5   | 12  |
| etcl_1_mut1 | <i>Enterobacter cloacae</i> complex | 96   | 3.13.0                        | PRJNA750050                 | SAMN20428006  | 43       | 54                | 943666            | 5145625      | 55.38  | 269554 | 131255 | 5   | 12  |
| etcl_1_mut2 | <i>Enterobacter cloacae</i> complex | 96   | 3.13.0                        | PRJNA750050                 | SAMN20428007  | 53       | 56                | 943666            | 5143992      | 55.39  | 269554 | 131255 | 5   | 12  |
| etcl_1_mut3 | <i>Enterobacter cloacae</i> complex | 96   | 3.13.0                        | PRJNA750050                 | SAMN20428008  | 41       | 61                | 667504            | 5143401      | 55.38  | 250592 | 131255 | 7   | 15  |
| etcl_1_mut4 | <i>Enterobacter cloacae</i> complex | 96   | 3.13.0                        | PRJNA750050                 | SAMN20428009  | 49       | 56                | 668231            | 5143938      | 55.38  | 269554 | 131255 | 6   | 13  |
| etcl_1_mut5 | <i>Enterobacter cloacae</i> complex | 96   | 3.13.0                        | PRJNA750050                 | SAMN20428010  | 41       | 59                | 602811            | 5142507      | 55.38  | 269554 | 111882 | 6   | 14  |
| KE5351      | <i>Enterobacter cloacae</i> complex | 96   | 3.13.0                        | PRJNA546126                 | SAMN21531226  | 54       | 51                | 869925            | 5111164      | 55.39  | 322228 | 151054 | 5   | 11  |
| KE5351_mut1 | <i>Enterobacter cloacae</i> complex | 96   | 3.13.0                        | PRJNA750050                 | SAMN20428011  | 42       | 57                | 667494            | 5105937      | 55.39  | 266038 | 131255 | 6   | 14  |
| KE5351_mut2 | <i>Enterobacter cloacae</i> complex | 96   | 3.13.0                        | PRJNA750050                 | SAMN20428012  | 26       | 60                | 572807            | 5104811      | 55.39  | 198798 | 131255 | 8   | 15  |
| KE5351_mut3 | <i>Enterobacter cloacae</i> complex | 96   | 3.13.0                        | PRJNA750050                 | SAMN20428013  | 31       | 55                | 667835            | 5103008      | 55.39  | 251756 | 131255 | 7   | 15  |
| KE5351_mut4 | <i>Enterobacter cloacae</i> complex | 96   | 3.13.0                        | PRJNA750050                 | SAMN20428014  | 32       | 56                | 712929            | 5106387      | 55.39  | 251756 | 147562 | 6   | 13  |
| KE5351_mut5 | <i>Enterobacter cloacae</i> complex | 96   | 3.13.0                        | PRJNA750050                 | SAMN20428015  | 39       | 57                | 667494            | 5107158      | 55.39  | 250587 | 131255 | 7   | 15  |

Abbrv. MLST=multi-locus sequence type

## References

- 1 Klein, S. *et al.* Rapid development of cefiderocol resistance in carbapenem-resistant *Enterobacter cloacae* during therapy is associated with heterogeneous mutations in the catecholate siderophore receptor *cirA*. *Clin Infect Dis*, doi:10.1093/cid/ciab511 (2021).
